# Supplementary material
Source: Elsevier journal article supplement (https://www.sciencedirect.com/science/article/pii/S1885585721001882)
Supplement: mmc1 [file S1885585721001882:mmc1.pdf]

# SUPPLEMENTARY DATA

## Table 1 of the supplementary data

Baseline characteristics of the study population by indication for retransplant

|                                                  | Acute rejection<br>(n = 16) | Cardiac allograft<br>vasculopathy<br>(n = 73) | Primary graft failure<br>(n = 41) | Unspecific graft<br>failure<br>(n = 43) | P   |
|--------------------------------------------------|-----------------------------|-----------------------------------------------|-----------------------------------|-----------------------------------------|-----|
| <b>Recipient</b>                                 |                             |                                               |                                   |                                         |     |
| <i>Age at HT, y</i>                              | 50.0 [45.0-57.0]            | 53.0 [44.5-58.0]                              | 52.0 [42.0-59.0]                  | 52.0 [40.0-60.0]                        | .99 |
| <i>Sex, female</i>                               | 2 (12.5)                    | 11 (15.1)                                     | 12 (29.3)                         | 11 (25.6)                               | .21 |
| <i>Weight, kg</i>                                | 71.4 [64.7-79.7]            | 72.1 [65.2-81.6]                              | 64.1 [56.0-73.1]                  | 70.0 [60.0-79.0]                        | .01 |
| <i>Renal dysfunction</i>                         | 7 (43.8)                    | 39 (53.4)                                     | 13 (31.7)                         | 22 (51.2)                               | .14 |
| <i>Pulmonary vascular resistance, Wood units</i> | 2.1 [1.3-3.5]               | 1.8 [1.1-2.4]                                 | 2.2 [1.4-3.4]                     | 1.8 [1.2-2.6]                           | .08 |
| <i>Infection prior to HT</i>                     | 3 (18.8)                    | 5 (6.8)                                       | 9 (22.0)                          | 7 (16.3)                                | .12 |
| <i>Diabetes prior to HT</i>                      | 6 (37.5)                    | 17 (23.3)                                     | 2 (4.9)                           | 8 (18.6)                                | .02 |
| <i>COPD pre-HT</i>                               | 3 (18.8)                    | 0 (0,0)                                       | 5 (12.2)                          | 5 (11.6)                                | .01 |
| <i>Hypertension</i>                              | 7 (43.8)                    | 37 (50.7)                                     | 15 (36.6)                         | 14 (32.6)                               | .23 |

|                                      |                  |                  |                  |                  |        |
|--------------------------------------|------------------|------------------|------------------|------------------|--------|
| <i>Cytomegalovirus serology (+)</i>  | 14 (87.5)        | 66 (90.4)        | 31 (75.6)        | 39 (90.7)        | .12    |
| <i>Peripheral vascular disease</i>   | 2 (12.5)         | 7 (9.6)          | 3 (7.3)          | 2 (4.7)          | .72    |
| <i>Mechanical ventilation pre-HT</i> | 3 (18.8)         | 5 (6.8)          | 38 (92.7)        | 6 (14.0)         | < .001 |
| <i>Circulatory support pre-HT</i>    |                  |                  |                  |                  | < .001 |
| None                                 | 11 (68.8)        | 61 (83.6)        | 5 (12.2)         | 38 (88.4)        |        |
| IABP                                 | 4 (25.0)         | 10 (13.7)        | 26 (63.4)        | 3 (7.0)          |        |
| ECMO                                 | 0 (0.0)          | 1 (1.4)          | 3 (7.3)          | 1 (2.3)          |        |
| VAD                                  | 1 (6.3)          | 1 (1.4)          | 7 (17.1)         | 1 (2.3)          |        |
| <i>Neoplasia pre-HT</i>              | 1 (6.3)          | 4 (5.5)          | 2 (4.9)          | 3 (7.0)          | .98    |
| <b>Donor</b>                         |                  |                  |                  |                  |        |
| <i>Age, y</i>                        | 30.3 [20.5-42.4] | 34.0 [24.5-45.0] | 33.1 [21.0-40.6] | 35.0 [27.6-48.0] | .27    |
| <i>Sex, female</i>                   | 11 (68.8)        | 52 (71.2)        | 30 (72.3)        | 28 (65.1)        | .86    |
| <i>Weight, kg</i>                    | 71.1 [64.5-79.3] | 73.1 [65.0-80.0] | 70.0 [61.6-77.4] | 70.0 [64.4-82.1] | .67    |
| <i>Cause of death</i>                |                  |                  |                  |                  | .06    |
| Traumatic                            | 8 (50.0)         | 32 (43.8)        | 21 (51.2)        | 10 (23.3)        |        |
| Stroke                               | 2 (12.5)         | 23 (31.5)        | 14 (31.4)        | 20 (46.5)        |        |

|                                     |               |                |                 |                |        |
|-------------------------------------|---------------|----------------|-----------------|----------------|--------|
| Others                              | 6 (37.5)      | 18 (24.7)      | 6 (14.6)        | 13 (30.2)      |        |
| <i>Recipient male/donor female</i>  | 4 (25.0)      | 16 (21.9)      | 5 (12.2)        | 8 (18.6)       | .63    |
| <i>Recipient/donor weight ratio</i> | 1.0 [0.9-1.1] | 1.0 [0.9-1.1]  | 0.9 [0.8-1.1]   | 1.0 [0.8-1.1]  | .24    |
| <b>Surgical procedure</b>           |               |                |                 |                |        |
| <i>HT era</i>                       |               |                |                 |                | < .001 |
| 1984-1999                           | 11 (69.0)     | 18 (25.0)      | 24 (59.0)       | 12 (28.0)      |        |
| 2000-2018                           | 5 (31.0)      | 55 (75.0)      | 17 (41.0)       | 31 (72.0)      |        |
| <b>Cold ischemia time, h</b>        |               |                |                 |                | .78    |
| <i>Bicaval surgical technique</i>   | 3 (18.8)      | 23 (31.5)      | 5 (12.2)        | 19 (44.2)      | < .01  |
| <i>Time to retransplant, y</i>      | 0.6 [0.3-1.2] | 9.1 [5.7-13.1] | 0.01 [0.0-0.02] | 9.0 [1.7-12.8] | < .001 |
| <i>Induction therapy</i>            | 8 (50.0)      | 47 (64.4)      | 22 (53.7)       | 34 (79.1)      | .06    |

COPD, chronic obstructive pulmonary disease; ECMO, extracorporeal membrane oxygenator; HT, heart transplant; IABP, intra-aortic balloon pump; VAD, ventricular assist device.

The data are expressed as No. (%) or median [interquartile range].

**Table 2 of the supplementary data**

Univariable logistic regression analysis (imputed population) for the association with retransplant

| Variable                                         | Odds ratio | 95%CI      | P      |
|--------------------------------------------------|------------|------------|--------|
| <b>Recipient</b>                                 |            |            |        |
| <i>Age, y</i>                                    | 0.98       | 0.97-0.99  | < .001 |
| <i>Sex, female</i>                               | 1.06       | 0.73-1.54  | .75    |
| <i>Weight, kg</i>                                | 1.00       | 0.98-1.01  | .59    |
| <i>Renal dysfunction</i>                         | 4.05       | 2.94- 5.56 | < .001 |
| <i>Pulmonary vascular resistance, Wood units</i> | 0.88       | 0.75-1.03  | .10    |
| <i>Infection pre-HT</i>                          | 1.38       | 0.87-2.21  | .15    |
| <i>Diabetes pre-HT</i>                           | 1.27       | 0.86-1.89  | .23    |
| <i>COPD pre-HT</i>                               | 0.62       | 0.33-1.16  | .13    |
| <i>Hypertension pre-HT</i>                       | 1.69       | 1.23-2.33  | < .001 |
| <i>Cytomegalovirus serology (+)</i>              | 1.44       | 0.90-2.29  | .12    |
| <i>Peripheral vascular disease</i>               | 1.40       | 0.78-2.50  | .21    |
| <i>Mechanical ventilation pre-HT</i>             | 3.27       | 2.33-4.59  | < .001 |

|                                     |      |           |        |
|-------------------------------------|------|-----------|--------|
| <i>Circulatory support pre-HT</i>   |      |           | .01    |
| None                                | 1    |           |        |
| IABP                                | 2.48 | 1.73-3.55 | < .001 |
| ECMO                                | 1.01 | 0.41-2.59 | .98    |
| VAD                                 | 1.20 | 0.62-2.31 | .58    |
| <i>Neoplasia pre-HT</i>             | 0.59 | 0.29-1.19 | .14    |
| <b>Donor</b>                        |      |           |        |
| <i>Age, y</i>                       | 0.99 | 0.98-1.00 | .19    |
| <i>Sex, female</i>                  | 0.92 | 0.64-1.31 | .63    |
| <i>Weight, kg</i>                   | 0.99 | 0.98-1.00 | .12    |
| <i>Cause of death</i>               |      |           | .46    |
| Traumatic                           | 1    |           |        |
| Stroke                              | 0.91 | 0.64-1.30 | .62    |
| Other                               | 1.18 | 0.80-1.73 | .40    |
| <i>Recipient male/donor female</i>  | 0.86 | 0.54-1.38 | .52    |
| <i>Recipient/donor weight ratio</i> | 1.00 | 0.99-1.01 | .47    |

| <b>Surgical procedure</b>         |      |           |        |
|-----------------------------------|------|-----------|--------|
| <i>HT era</i>                     |      |           |        |
| 1987-2002                         | 1    |           |        |
| 2000-2018                         | 0.95 | 0.70-1.30 | .76    |
| <i>Cold ischemia time, h</i>      | 1.16 | 1.01-1.34 | .04    |
| <i>Bicaval surgical technique</i> | 0.52 | 0.37-0.72 | < .001 |
| <i>Induction therapy</i>          | 0.56 | 0.41-0.76 | < .001 |

COPD, chronic obstructive pulmonary disease; ECMO, extracorporeal membrane oxygenator; HT, heart transplant; IABP, intra-aortic balloon pump; VAD, ventricular assist device.

**Table 3 of the supplementary data**

Univariable parametric regression analysis with Weibull distribution for posttransplant mortality in retransplant compared with the no retransplantation population (imputed population)

| Variable                                         | Hazard ratio | 95%CI     | <i>P</i> |
|--------------------------------------------------|--------------|-----------|----------|
| <i>Re-HT</i>                                     | 1.81         | 1.53-2.15 | < .001   |
| <b>Recipient</b>                                 |              |           |          |
| <i>Age, y</i>                                    | 1.01         | 1.01-1.02 | < .001   |
| <i>Sex, female</i>                               | 0.88         | 0.81-0.95 | .001     |
| <i>Weight, kg</i>                                | 1.00         | 1.00-1.00 | .28      |
| <i>Renal dysfunction</i>                         | 1.34         | 1.24-1.44 | < .001   |
| <i>Pulmonary vascular resistance, Wood units</i> | 1.04         | 1.02-1.06 | < .001   |
| <i>Infection pre-HT</i>                          | 1.10         | 1.00-1.22 | .05      |
| <i>Diabetes pre-HT</i>                           | 1.19         | 1.10-1.29 | < .001   |
| <i>COPD pre-HT</i>                               | 1.12         | 1.02-1.23 | .01      |
| <i>Hypertension pre-HT</i>                       | 1.11         | 1.04-1.19 | .001     |
| <i>Cytomegalovirus serology (+)</i>              | 1.10         | 1.01-1.20 | .02      |

|                                      |      |           |        |
|--------------------------------------|------|-----------|--------|
| <i>Peripheral vascular disease</i>   | 1.26 | 1.12-1.41 | < .001 |
| <i>Mechanical ventilation pre-HT</i> | 1.31 | 1.19-1.43 | < .001 |
| <i>Circulatory support pre-HT</i>    |      |           | .95    |
| None                                 | 1    |           |        |
| IABP                                 | 0.99 | 0.90-1.09 | .88    |
| ECMO                                 | 1.08 | 0.89-1.31 | .45    |
| VAD                                  | 0.98 | 0.83-1.15 | .78    |
| <i>Cardiac surgery pre-HT</i>        | 1.25 | 1.17-1.34 | < .001 |
| <i>Neoplasia pre-HT</i>              | 1.16 | 0.99-1.38 | .07    |
| <b>Donor</b>                         |      |           |        |
| <i>Age, y</i>                        | 1.00 | 1.00-1.00 | .68    |
| <i>Sex, female</i>                   | 1.03 | 0.96-1.10 | .44    |
| <i>Weight, kg</i>                    | 0.99 | 0.99-1.00 | < .001 |
| <i>Cause of death</i>                |      |           | .85    |
| Traumatic                            | 1    |           |        |
| Stroke                               | 0.98 | 0.92-1.05 | .54    |



|                                     |      |            |        |
|-------------------------------------|------|------------|--------|
| Other                               | 1.00 | 0.93-1.09  | .90    |
| <i>Recipient male/donor female</i>  | 1.14 | 1.06-1.23  | < .001 |
| <i>Recipient/donor weight ratio</i> | 1.00 | 1.00-1.00  | < .001 |
| <b>Surgical procedure</b>           |      |            |        |
| <i>HT era</i>                       |      |            |        |
| 1987-2002                           | 1    |            |        |
| 2000-2018                           | 0.64 | 0.60-0.68  | < .001 |
| <i>Cold ischemia time, h</i>        | 0.99 | 0.96-1.02  | .54    |
| <i>Bicaval surgical technique</i>   | 0.81 | 0.76-0.86  | < .001 |
| <i>Induction therapy</i>            | 0.28 | 0.58- 0.66 | < .001 |

COPD, chronic obstructive pulmonary disease; ECMO, extracorporeal membrane oxygenator; HT, heart transplant; IABP, intra-aortic balloon pump; VAD, ventricular assist device.

# **Table 4 of the supplementary data**

Missing values

| Variable                      | N    | Percentage |
|-------------------------------|------|------------|
| Recipient age                 | 0    | 0.0        |
| Recipient sex                 | 0    | 0.0        |
| Recipient weight              | 171  | 2.3        |
| Renal dysfunction             | 365  | 4.8        |
| Pulmonary vascular resistance | 1331 | 17.5       |
| Infection pre-HT              | 260  | 3.4        |
| Diabetes pre-HT               | 288  | 3.8        |
| COPD pre-HT                   | 460  | 6.1        |
| Hypertension pre-HT           | 399  | 5.3        |
| Cytomegalovirus serology (+)  | 566  | 7.5        |
| Peripheral vascular disease   | 295  | 3.9        |
| Mechanical ventilation pre-HT | 251  | 3.3        |
| Circulatory support pre-HT    | 237  | 3.1        |

|                              |      |      |
|------------------------------|------|------|
| Cardiac surgery pre-HT       | 244  | 3.2  |
| Neoplasia pre-HT             | 338  | 4.5  |
| Donor age, y                 | 109  | 1.4  |
| Donor sex                    | 167  | 2.2  |
| Donor weight, kg             | 276  | 3.6  |
| Donor cause of death         | 0    | 0.0  |
| Recipient male/donor female  | 167  | 2.2  |
| Recipient/donor weight ratio | 392  | 5.2  |
| HT era                       | 0    | 0.0  |
| Surgical technique           | 142  | 1.9  |
| Cold ischemia time, h        | 177  | 2.3  |
| Induction therapy            | 6    | 0.1  |
| Total missing values         | 6641 | 3.6  |
| Cases with missing values    | 2381 | 31.4 |

COPD, chronic obstructive pulmonary disease; HT, heart transplant.
